# Supplementary material
Source: PubMed Central journal article supplement (PMC3359790)

**A**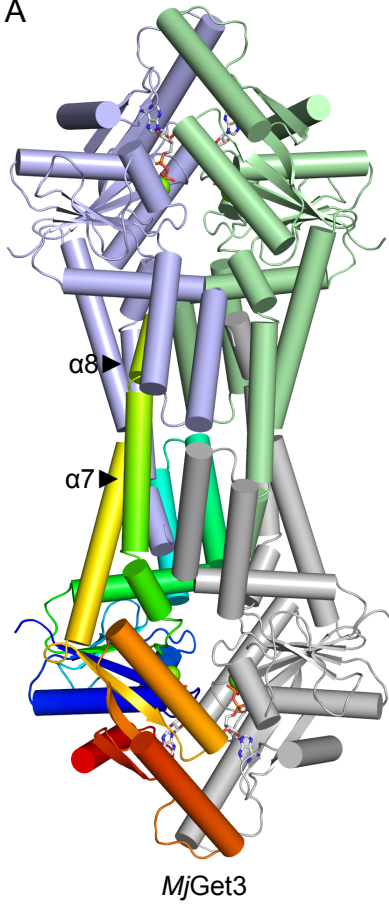**B**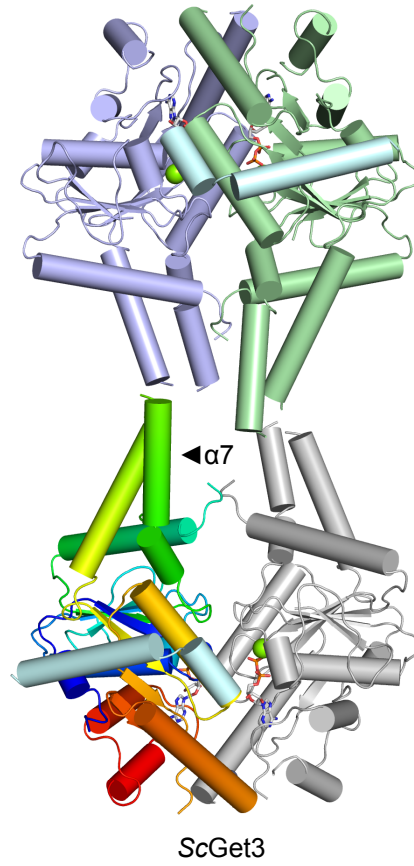

Supplement: NIHMS365936-supplement-01.pdf [file NIHMS365936-supplement-01.pdf]

A

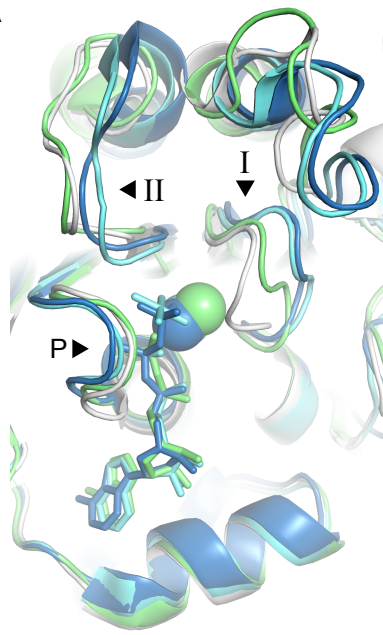

NifH

B

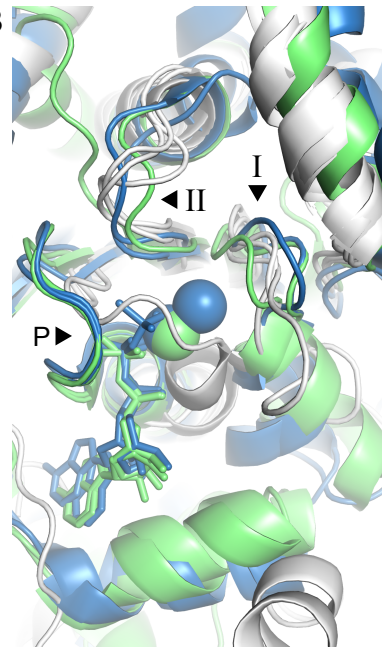

ParA

|                  |
|------------------|
| apo              |
| ADP              |
| $\text{AlF}_4^-$ |
| $\text{ATP}^*$   |

Supplement: NIHMS365936-supplement-02.pdf [file NIHMS365936-supplement-02.pdf]
